# Supplementary material for: Capsicumicine, a New Bioinspired Peptide from Red Peppers Prevents Staphylococcal Biofilm In Vitro and In Vivo via a Matrix Anti-Assembly Mechanism of Action
Source: PubMed Central journal article supplement (PMC8549733; doi:10.1128/spectrum.00471-21), 2021-10-27
Supplement: spectrum00471-21_supp_1_seq4.pdf [file spectrum00471-21_supp_1_seq4.pdf]

1 **Supplementary Materials for**

2  
3 **Capsicumine, a new peptide bioinspired from red peppers, prevents staphylococcal biofilm**  
4 ***in vitro* and *in vivo* via a matrix anti-assembly mechanism of action**

5 **Rafael Gomes Von Borowski<sup>1,2</sup>, Sophie Chat<sup>1</sup>, Rafael Schneider<sup>1,2</sup>, Sylvie Nonin-Lecomte<sup>3</sup>,**

6 **Serge Bouaziz<sup>3</sup>, Emmanuel Giudice<sup>1</sup>, Aline Rigon Zimmer<sup>2</sup>, Simone Cristina Baggio**

7 **Gnoatto<sup>2</sup>, Alexandre José Macedo<sup>2,4,\*</sup>, and Reynald Gillet<sup>1,\*</sup>**

8  
9 <sup>1</sup> Univ. Rennes, CNRS, Institut de Génétique et de Développement de Rennes (IGDR), UMR6290,  
10 Rennes, France; <sup>2</sup>Programa de Pós-Graduação em Ciências Farmacêuticas, Faculdade de Farmácia,  
11 Universidade Federal do Rio Grande do Sul, 90610-000 Porto Alegre, Brazil; <sup>3</sup>Université de Paris,  
12 CNRS, CiTCoM (Cibles Thérapeutiques et Conception de Médicaments) UMR 8038, Faculté de  
13 Pharmacie, 75006 Paris, France; <sup>4</sup>Centro de Biotecnologia da Universidade Federal do Rio Grande do  
14 Sul, 91501-970 Porto Alegre, Brazil

15  
16 <sup>\*</sup>To whom correspondence may be addressed. Email [reynald.gillet@univ-rennes1.fr](mailto:reynald.gillet@univ-rennes1.fr) or  
17 [alexandre.jose.macedo@gmail.com](mailto:alexandre.jose.macedo@gmail.com).

18  
19  
20  
21  
22 **Table S1.** Primers used in this study. These were previously designed using the Primer3 program and  
23 standardized by our team.

| Gene        | Forward primer 5'-3'   | Reverse primer 5'-3'     | Amplicon |
|-------------|------------------------|--------------------------|----------|
| <i>atlE</i> | TACCAGGGTTTGCAGGATTC   | GGCGCTAAATTCATTGGAAA     | 85 pb    |
| <i>aap</i>  | AGGCCGTACCAACAGTGAAT   | ATGGGCCAAACGTAGACAAGG    | 100 pb   |
| <i>agrC</i> | TCATCAATATCGCATTTCATCG | CCTAAACCGCGATTATCACC     | 136 pb   |
| <i>icaA</i> | TTATCAATGCCGAGTTGTC    | CCGTTGGATATTGCCTCTGT     | 104 pb   |
| <i>leuA</i> | GATGATCTCGGAATGGCAGT   | TGAGGCATTTCTGCTCTTT      | 108 pb   |
| <i>saeR</i> | GCTAACACTGTCAATGTCCACA | AGGCCCCACACAGTTGTAAT     | 92 pb    |
| <i>saeS</i> | GGCGTCAATTTGTTGTGCTA   | AGGGCATAGGTATCGTTCCA     | 140 pb   |
| <i>sarA</i> | TTTGCTTCTGTGATACGGTTGT | CGTAATGAACACGATGAAAGAACT | 107 pb   |
| <i>gyrB</i> | ATCAACATCGGCATCAGTCA   | GCATTTGGTACGGGTATTGG     | 87 pb    |
| <i>rrsA</i> | AAGCAACCGGAAGAACCTTA   | ATGCACCACCTGTCACTCTG     | 95 pb    |

24

25 **Table S2.** Carbohydrate-binding domain proteins that are capsicumicine homologs. These proteins  
 26 are available in the UniProtKB database and were used for BLAST and amino acid alignments to  
 27 perform similarity analysis.

| Entry            | Name                                                        | Accession ID |
|------------------|-------------------------------------------------------------|--------------|
| ICAA_STAEQ       | Intercellular adhesion protein <i>icaA</i>                  | Q5HKQ0.1     |
| ICAD_STAEQ       | Poly-beta-1,6-N-acetyl-D-glucos. synthase prot. <i>icaD</i> | Q5HKP9       |
| A7Z8H9_BACVZ     | Chitosanase                                                 | A7Z8H9       |
| A0A0N0MLT5_9ACTN | Chitosanase                                                 | A0A0N0MLT5   |
| CBP2_MOROL       | Chitin-binding protein 2                                    | COHKC5       |
| A0A1R0GTZ5_9FUNG | Chitin synthase 8                                           | A0A1R0GTZ5   |
| A0A194V113_9PEZI | Chitin biosynthesis protein CHS5                            | A0A194V113   |

28

29 **Table S3.** Results of the CD spectra deconvolution using CDSSTR algorithm.

| Day | Temp (°C) | Helix (%) | Bêta (%) | Turn (%) | Unfolded (%) |
|-----|-----------|-----------|----------|----------|--------------|
| 0   | 5         | 42-46     | 29-34    | 5-8      | 16-21        |
| 1   | 5         | 42-45     | 30-32    | 6-8      | 20-21        |
| 5   | 5         | 38-42     | 24-31    | 8-12     | 17-23        |
| 5   | 15        | 22-26     | 36-45    | 13-14    | 20-26        |
| 5   | 30        | 16-24     | 33-40    | 18-20    | 20-25        |
| 7   | 30        | 6-17      | 38-41    | 10-23    | 31-35        |

30

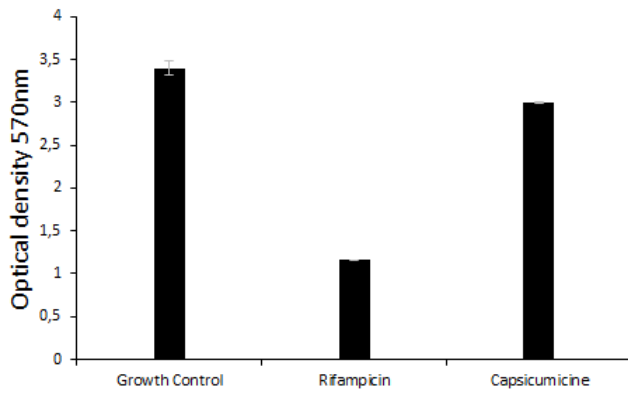

31

32 **Fig. S1.** Biofilm eradication test. Shown are *Staphylococcus epidermidis* (ATCC 35984) biofilm  
 33 quantifications at OD<sub>570</sub> for the bacterial biofilm without peptide exposure (“Growth Control”), after  
 34 exposure to the rifampicin antibiotic control, and after 24 h treatment with 100 μM capsicumicine.  
 35

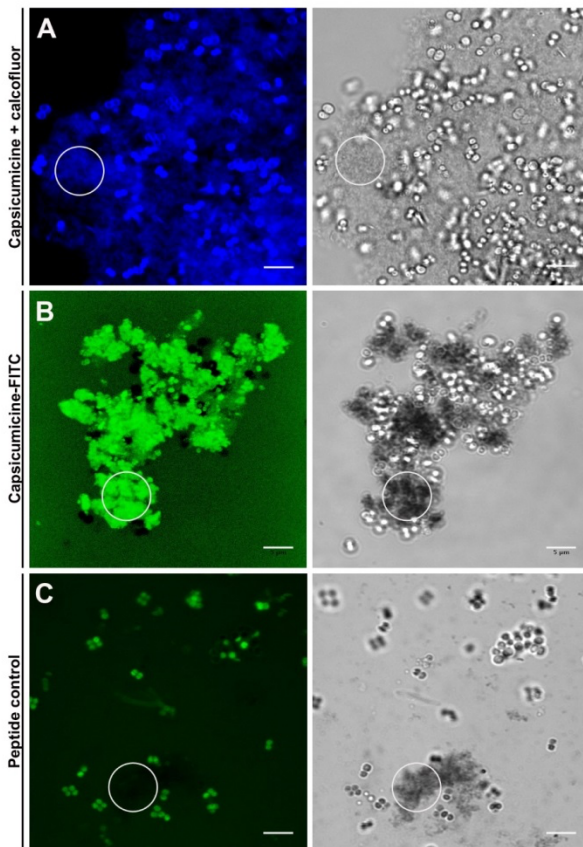

36

37 **Fig. S2.** Confocal fluorescence microscopy (CFM) of *Staphylococcus epidermidis* (ATCC 35984).  
 38 Calcofluor was used to highlight matrix polysaccharides (blue), and FITC used for the peptides  
 39 (green). Visualization was done by fluorescence (left) and transmitted light (right) microscopy. (A)  
 40 Cultures exposed to capsicumicine and calcofluor. (B) Cultures exposed to capsicumicine-FITC. (C)  
 41 Peptide negative control cultures exposed to an antimicrobial peptide-FITC (Pseudonajide). The  
 42 matrix is highlighted (circles). Scale bars, 5 μm.

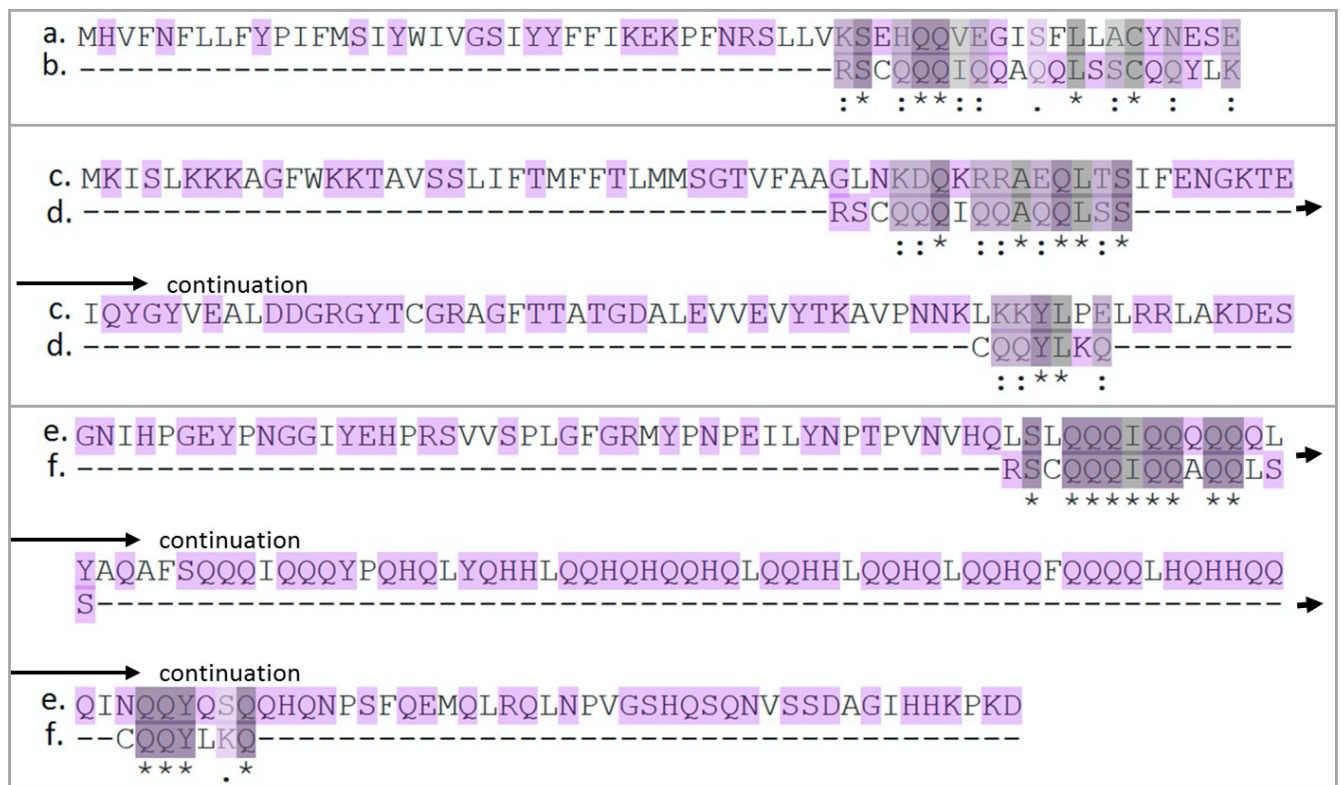

44

45 **Fig. S3.** Amino acid alignment of capsicumicine and its carbohydrate-binding domain protein  
46 homologs. (a) The *icaA* (protein accession number Q5HKQ0.1) fragment from 1 to 60. (b)  
47 Capsicumicine fragment from 1 to 21. (c) Chitosanase (A7Z8H9) fragment from 1 to 60 and from 61  
48 to 120. (d) Capsicumicine fragment from 1 to 15 and from 16 to 22. (e) Chitin synthase 8  
49 (A0A1R0GTZ5) fragment from 1801 to 1860 and from 1921 to 1967. (f) Capsicumicine fragment from  
50 1 to 14 and from 16 to 22. Equal (\* and grey highlighting), similar (.), and highly similar (:)  
51 amino acids are indicated, as well as amino acid polar characteristics (purple). Support for this analysis is  
52 available at UniProt.  
53

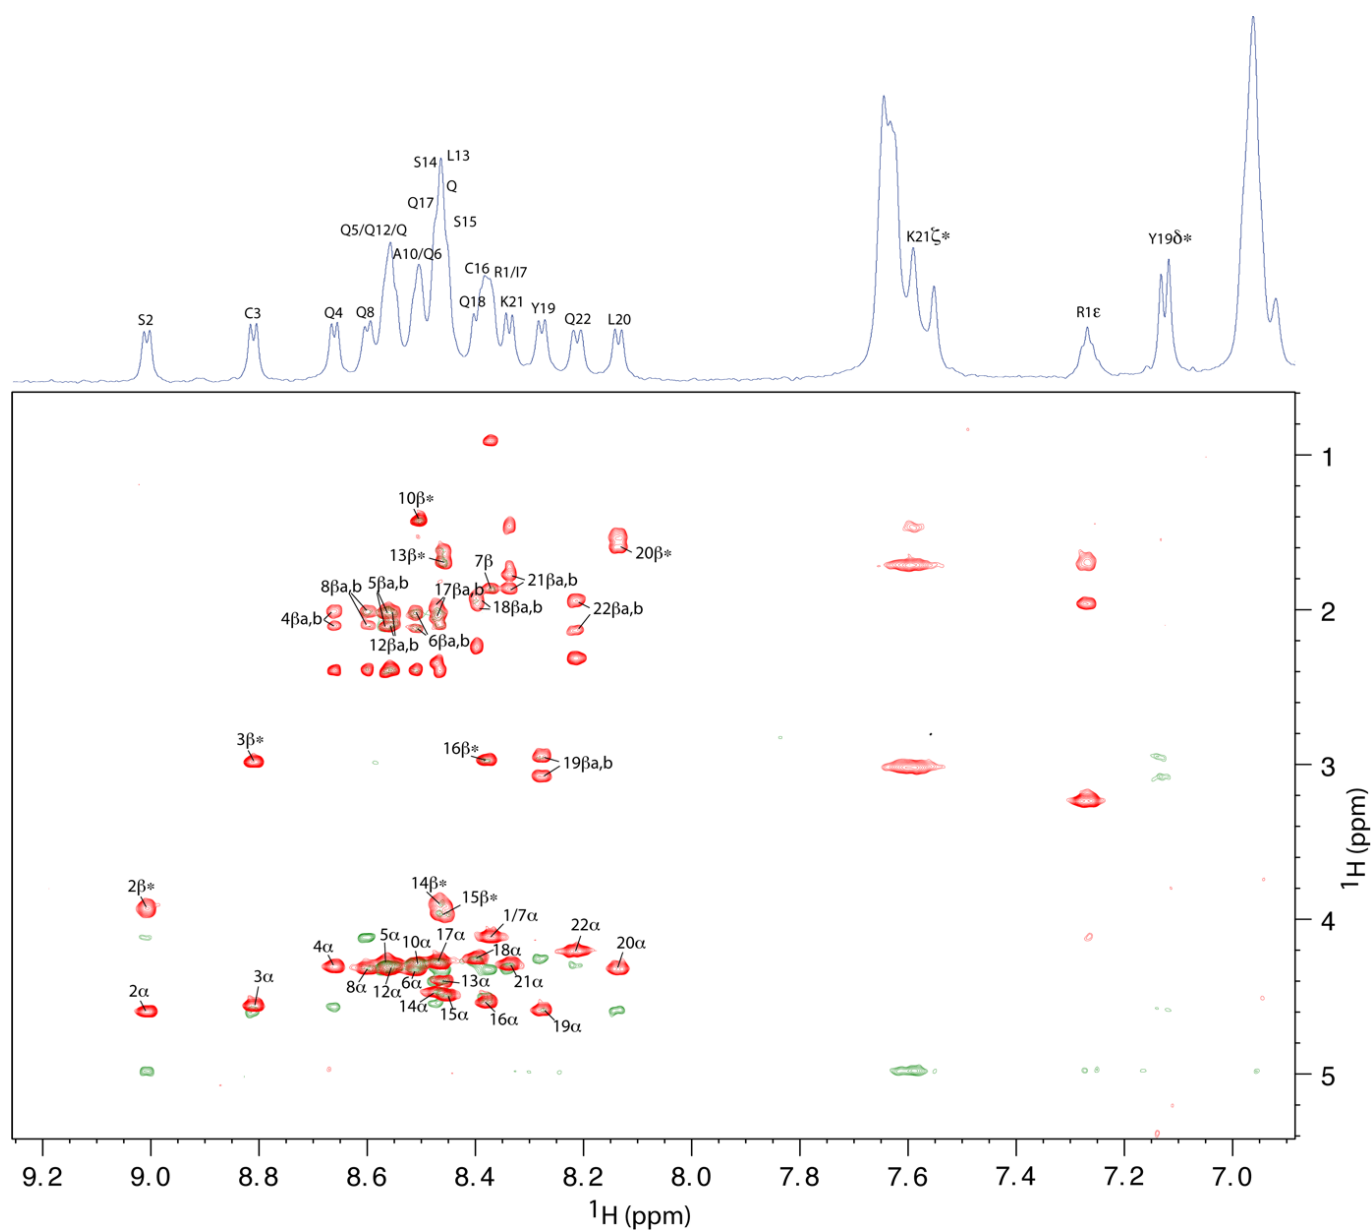

54

55 **Fig. S4.** Superposition of the TOCSY (red), NOESY (green) and 1D (blue) spectra of capsicumicine  
 56 recorded at pH 5.0 and 10°C. All amide NH resonances were assigned using nNH-(n-1)H $\alpha$  NOESY  
 57 cross-peaks, except for Q9 and Q11 residues due to poor resolution. For clarity, only NH-H $\alpha$  and NH-  
 58 H $\beta$  labels were reported. The spectra display 22 spin systems as expected for a single conformation.  
 59 According to the spectral dispersion, capsicumicine is mainly folded.  
 60

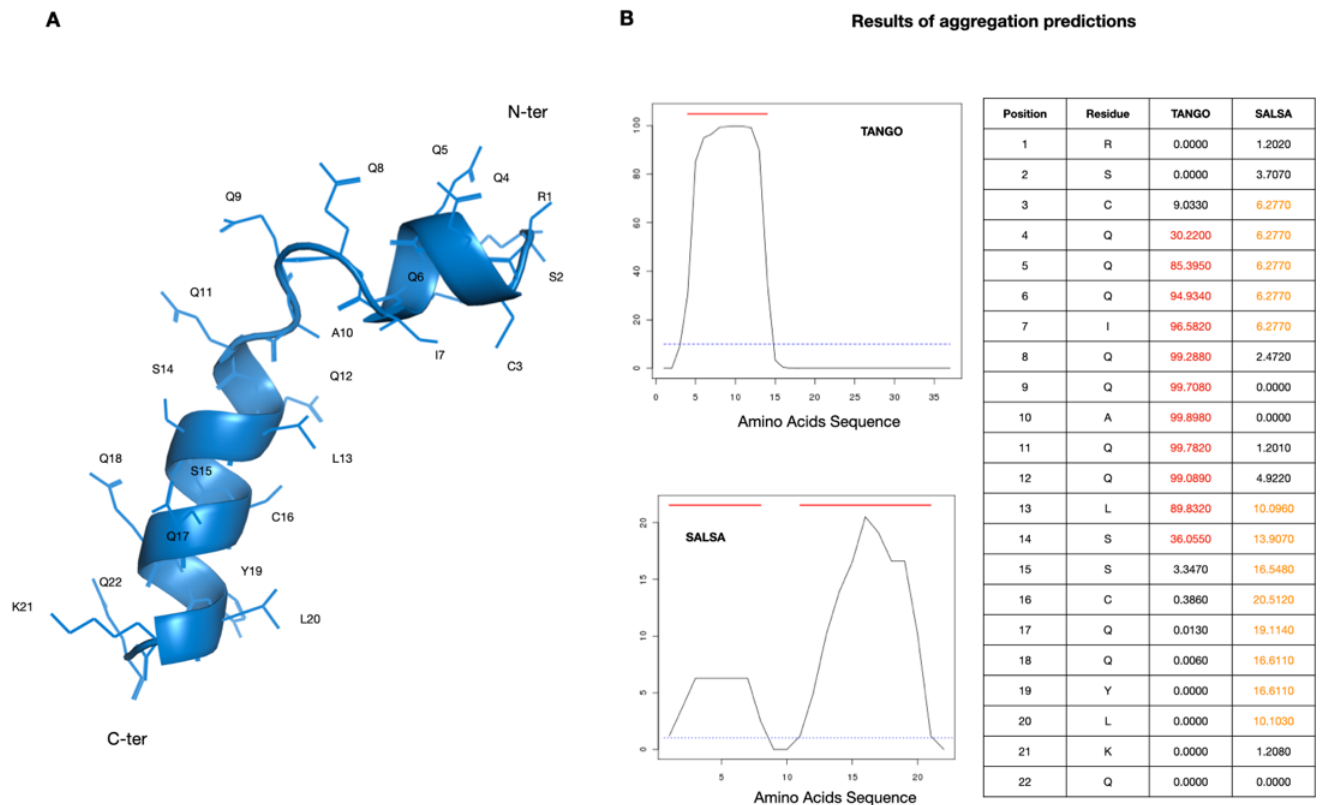

61

62 **Fig. S5. (A)** Predicted capsicumicine structure using the Phyre<sup>2</sup> prediction server. **(B)** Aggregation  
 63 structure predictions using TANGO (1) and SALSA (2) algorithms.

64

65 **Supplementary References**

- 66 1. L. A. Kelley, S. Mezulis, C. M. Yates, M. N. Wass, M. J. Sternberg, The Phyre2 web portal for  
 67 protein modeling, prediction and analysis. Nat Protoc 10, 845-858 (2015).  
 68  
 69 2. S. Zibae, O. S. Makin, M. Goedert, L. C. Serpell, A simple algorithm locates beta-strands in  
 70 the amyloid fibril core of alpha-synuclein, Abeta, and tau using the amino acid sequence  
 71 alone. Protein Sci 16, 906-918 (2007).  
 72
